# Supplementary material for: Marine bisindole alkaloid 2,2-bis(6-bromo-3-indolyl)ethylamine to control and prevent fungal growth on building material: a potential antifungal agent
Source: Springer Nature journal article supplement (doi:10.1007/s00253-019-09895-9), 2019-05-18

## **Applied Microbiology & Biotechnology**

### **Marine bisindole alkaloid 2,2-bis(6-bromo-3-indolyl)ethylamine to control and prevent fungal growth on building material: a potential antifungal agent**

Raffaella Campana\*, Maurizio Sisti, Luigia Sabatini, Simone Lucarini

Department of Biomolecular Sciences, University of Urbino, 61029 Urbino (PU), Italy

\*Corresponding author

Dr. Raffaella Campana, PhD,

Department of Biomolecular Sciences

Division of Toxicological, Hygiene and Environmental Sciences

Via S. Chiara 27, 61029

Urbino, Italy

Tel: +39 0722 303543

Fax: +39 0722 303541

e-mail: [raffaella.campana@uniurb.it](mailto:raffaella.campana@uniurb.it)

**Supplementary Table S1.** List of the fungi used in this study with the related source of isolation.

| <b>Fungal species</b>             | <b>Source of isolation</b>           |
|-----------------------------------|--------------------------------------|
| <i>A. corymbifera</i> EHS01       | Hospital setting surfaces            |
| <i>A. alternata</i> BC01          | Environment                          |
| <i>A. flavipes</i> EHS02          | Hospital setting surfaces            |
| <i>A. flavus</i> IDRA01           | Indoor air                           |
| <i>A. fumigatus</i> IDRAH01       | Indoor air from hospital environment |
| <i>A. nidulans</i> IDRAH04        | Indoor air from hospital environment |
| <i>A. terreus</i> IDRS023         | Indoor setting surfaces              |
| <i>A. versicolor</i> IDRA02       | Indoor air                           |
| <i>A. ustus</i> IDRS08            | Indoor setting surfaces              |
| <i>F. solani</i> IDRS03           | Indoor setting surfaces              |
| <i>F. sporotrichioides</i> IDRS05 | Indoor setting surfaces              |
| <i>M. circinelloides</i> EHS03    | Hospital setting surfaces            |
| <i>P. citrinum</i> LC1            | Environment                          |
| <i>Rhizopus</i> spp. IDRAH07      | Indoor air from hospital environment |
| <i>T. rubrum</i> EHS05            | Surfaces hospital setting            |
| <i>T. tonsurans</i> EHS06         | Surfaces hospital setting            |
| <i>C. cladosporioides</i>         | ATCC 16022                           |

**Supplementary Figure S1.** Example of the building material IG21 (finishing plaster), distributed on NSA, and treated with 2,2-bis(6-bromo-3-indolyl)ethylamine (URB 1204) or commercial antifungal for the artificial contamination with different fungal strains.

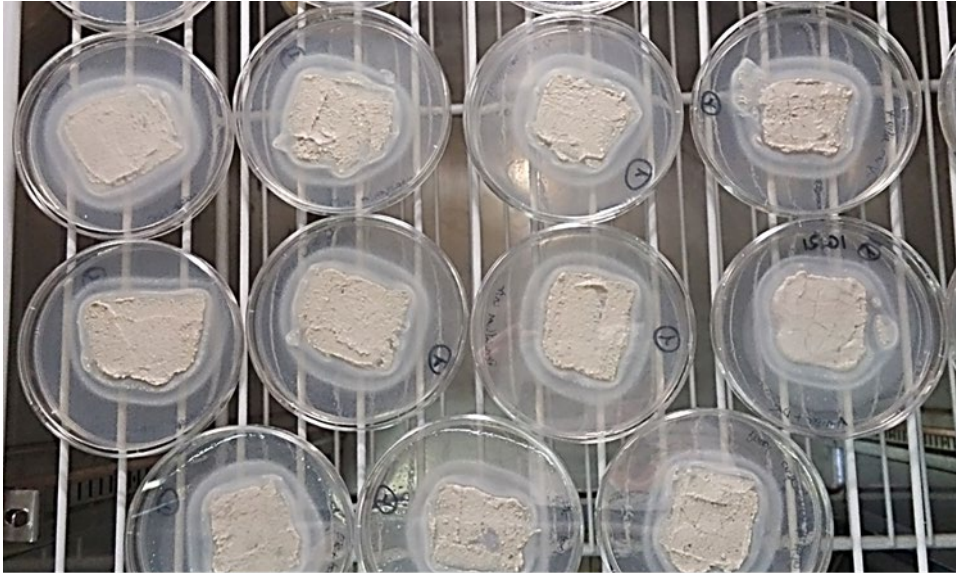

**Supplementary Figure S2.** Representative visual observations of commercial antifungal effect on the growing of different fungi (*P. citrinum* LS1, *A. alternata* BC01 and *C. cladosporioides* ATCC 16022), alone and as mixed fungi, on the surface of IG21 (finishing plaster) after 28 days of incubation.

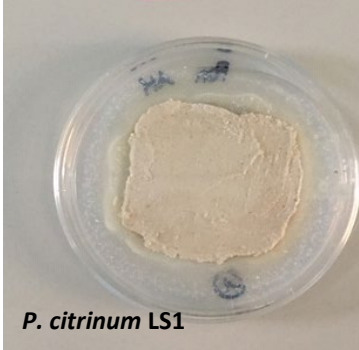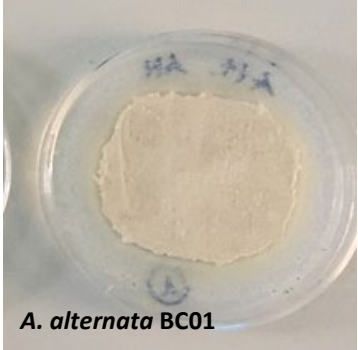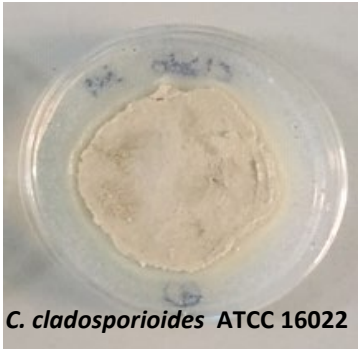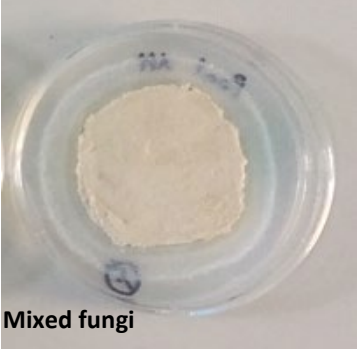

Supplement: 253_2019_9895_MOESM1_ESM.pdf [file 253_2019_9895_MOESM1_ESM.pdf]
